# Supplementary material for: Morphopathogenesis of Adult Acquired Cholesteatoma
Source: MDPI journal article supplement (doi:10.3390/medicina59020306), 2023-02-07
Supplement: s1 [file s1]

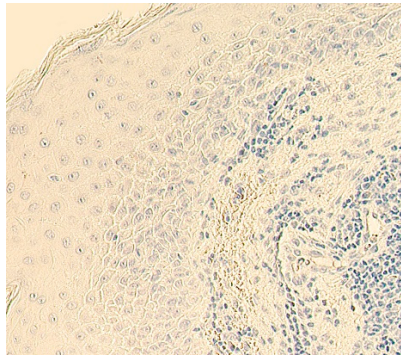

**Figure S1.** The example of test sample of the cholesteatoma: MMP2 negative control in cholesteatoma tissue. X 250. Positive controls in accordance to the companies guidelines and negative controls with excluding of primary antibody were developed.

**Figure S2.** Pictures of each criterion of semi-quantitative method.

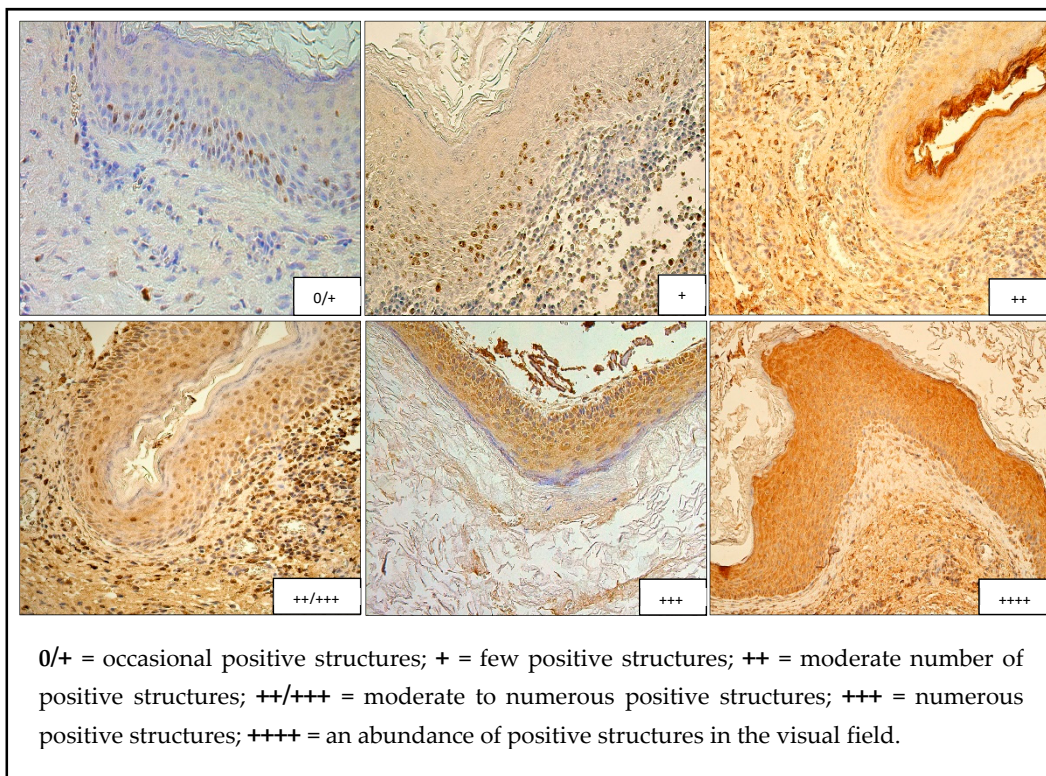

**Figure S2.** Pictures of each criterion of semi-quantitative method.

**Table S1.** Additional statistical information.

| Group    |                |         | MMP<br>-2 M | MM<br>P-2 P | MM<br>P-9M  | MM<br>P-9P  | TIM<br>P-2<br>M | TIM<br>P-2 P | TIM<br>P-4M | TIM<br>P-4P | Shh<br>M    | Shh P       | IL-1<br>M   | IL-1<br>P   | IL-10<br>M  | IL-10<br>P  | NFK<br>B M  | NFK<br>B P  | Ki-67<br>M  | Ki-67<br>P  | VEG<br>F M  | VEG<br>F P  | HBD-<br>2 M | HBD-<br>2 P | HBD-<br>4 M | HBD-<br>4 P |
|----------|----------------|---------|-------------|-------------|-------------|-------------|-----------------|--------------|-------------|-------------|-------------|-------------|-------------|-------------|-------------|-------------|-------------|-------------|-------------|-------------|-------------|-------------|-------------|-------------|-------------|-------------|
| Patients | N              | Valid   | 19          | 19          | 19          | 19          | 19              | 19           | 19          | 19          | 19          | 19          | 19          | 19          | 19          | 19          | 19          | 19          | 19          | 19          | 19          | 19          | 19          | 19          | 19          | 19          |
|          |                | Missing | 0           | 0           | 0           | 0           | 0               | 0            | 0           | 0           | 0           | 0           | 0           | 0           | 0           | 0           | 0           | 0           | 0           | 0           | 0           | 0           | 0           | 0           | 0           | 0           |
|          | Mean           |         | 1.54<br>37  | 1.33<br>32  | 0.42<br>11  | 0.71<br>89  | 0.85<br>05      | 0.59<br>53   | 2.50<br>00  | 2.05<br>26  | 2.47<br>37  | 1.81<br>58  | 1.26<br>32  | 1.11<br>37  | 1.47<br>37  | 1.24<br>53  | 1.97<br>37  | 1.27<br>16  | 0.65<br>68  | 0.56<br>05  | 1.68<br>37  | 0.69<br>26  | 1.55<br>26  | 1.08<br>74  | 0.78<br>05  | 0.58<br>63  |
|          | Std. Deviation |         | 0.86<br>064 | 0.61<br>644 | 0.53<br>394 | 0.43<br>442 | 0.94<br>937     | 0.60<br>230  | 0.81<br>650 | 0.72<br>447 | 0.71<br>635 | 0.58<br>239 | 0.91<br>846 | 0.76<br>020 | 1.03<br>379 | 0.82<br>512 | 0.63<br>407 | 0.96<br>455 | 0.32<br>692 | 0.47<br>580 | 0.89<br>646 | 0.68<br>121 | 0.59<br>849 | 0.63<br>477 | 0.95<br>113 | 0.50<br>496 |
|          | Minimum        |         | 0.00        | 0.33        | 0.00        | 0.00        | 0.00            | 0.00         | 0.00        | 0.00        | 1.00        | 0.50        | 0.00        | 0.00        | 0.00        | 0.00        | 1.00        | 0.00        | 0.33        | 0.00        | 0.33        | 0.00        | 0.50        | 0.00        | 0.00        | 0.00        |
|          | Maximum        |         | 3.50        | 3.00        | 2.00        | 1.50        | 3.00            | 2.00         | 3.50        | 3.00        | 4.00        | 3.00        | 3.00        | 3.00        | 3.00        | 3.00        | 3.00        | 3.00        | 1.50        | 1.50        | 3.00        | 2.00        | 2.50        | 2.00        | 3.00        | 2.00        |
| Control  | N              | Valid   | 7           | 7           | 7           | 7           | 7               | 7            | 7           | 7           | 7           | 7           | 7           | 7           | 7           | 7           | 7           | 7           | 7           | 7           | 7           | 7           | 7           | 7           | 7           | 7           |
|          |                | Missing | 0           | 0           | 0           | 0           | 0               | 0            | 0           | 0           | 0           | 0           | 0           | 0           | 0           | 0           | 0           | 0           | 0           | 0           | 0           | 0           | 0           | 0           | 0           | 0           |
|          | Mean           |         | 1.07<br>14  | 0.92<br>86  | 1.07<br>14  | 0.69<br>00  | 1.57<br>14      | 0.71<br>43   | 2.14<br>29  | 1.64<br>29  | 1.64<br>29  | 0.64<br>29  | 0.64<br>29  | 0.71<br>43  | 1.78<br>57  | 1.50<br>00  | 0.71<br>43  | 0.47<br>57  | 0.09<br>43  | 0.09<br>43  | 2.42<br>86  | 0.78<br>57  | 1.04<br>71  | 0.26<br>14  | 1.21<br>43  | 0.57<br>14  |
|          | Std. Deviation |         | 1.20<br>515 | 0.18<br>898 | 0.44<br>987 | 0.41<br>356 | 0.78<br>680     | 0.39<br>340  | 0.69<br>007 | 0.47<br>559 | 1.43<br>510 | 0.47<br>559 | 0.55<br>635 | 0.26<br>726 | 0.63<br>621 | 0.64<br>550 | 0.69<br>864 | 0.50<br>411 | 0.16<br>102 | 0.16<br>102 | 0.44<br>987 | 0.48<br>795 | 0.69<br>921 | 0.25<br>182 | 0.39<br>340 | 0.34<br>503 |
|          | Minimum        |         | 0.00        | 0.50        | 0.50        | 0.33        | 0.50            | 0.00         | 1.00        | 1.00        | 0.00        | 0.00        | 0.00        | 0.50        | 1.00        | 0.50        | 0.00        | 0.00        | 0.00        | 0.00        | 2.00        | 0.00        | 0.33        | 0.00        | 1.00        | 0.00        |
|          | Maximum        |         | 3.00        | 1.00        | 1.50        | 1.50        | 2.50            | 1.00         | 3.00        | 2.00        | 3.50        | 1.00        | 1.50        | 1.00        | 2.50        | 2.00        | 2.00        | 1.50        | 0.33        | 0.33        | 3.00        | 1.50        | 2.00        | 0.50        | 2.00        | 1.00        |
